# Supplementary material for: Comparison of PPAR Ligands as Modulators of Resolution of Inflammation, via Their Influence on Cytokines and Oxylipins Release in Astrocytes
Source: MDPI journal article supplement (doi:10.3390/ijms21249577), 2020-12-16
Supplement: s1 [file s1]

## **SUPPLEMENTARY**

### **Comparison of PPAR ligands as modulators of resolution of inflammation via influence on cytokines and oxylipins release in astrocytes**

Dmitry V. Chistyakov <sup>1,3,\*</sup>, Alina A. Astakhova <sup>1</sup>, Sergei V. Goriainov <sup>3</sup>, and Marina G. Sergeeva <sup>1</sup>

<sup>1</sup> Belozersky Institute of Physico-Chemical Biology, Moscow State University, Moscow 119992, Russia; alina.an.astakhova@gmail.com (A.A.A.); mg.sergeeva@gmail.com (M.G.S.)

<sup>2</sup> Faculty of Bioengineering and Bioinformatics, Moscow Lomonosov State University, Moscow 119234 Russia; ridernadya@gmail.com

<sup>3</sup> SREC PFUR Peoples' Friendship University of Russia (RUDN University), Moscow, Russia; goryainovs@list.ru (S.V.G.), chistvic@gmail.com (V.V.C.)

\* Correspondence: chistyakof@gmail.com; Tel.: +7-495-939-4332

#### **\*Corresponding authors:**

Dmitry V. Chistyakov Belozersky Institute of Physico-Chemical Biology, Lomonosov Moscow State University, 1-40 Leninsky Gory, Moscow, 119992 Russia;

A

## COX-pathway

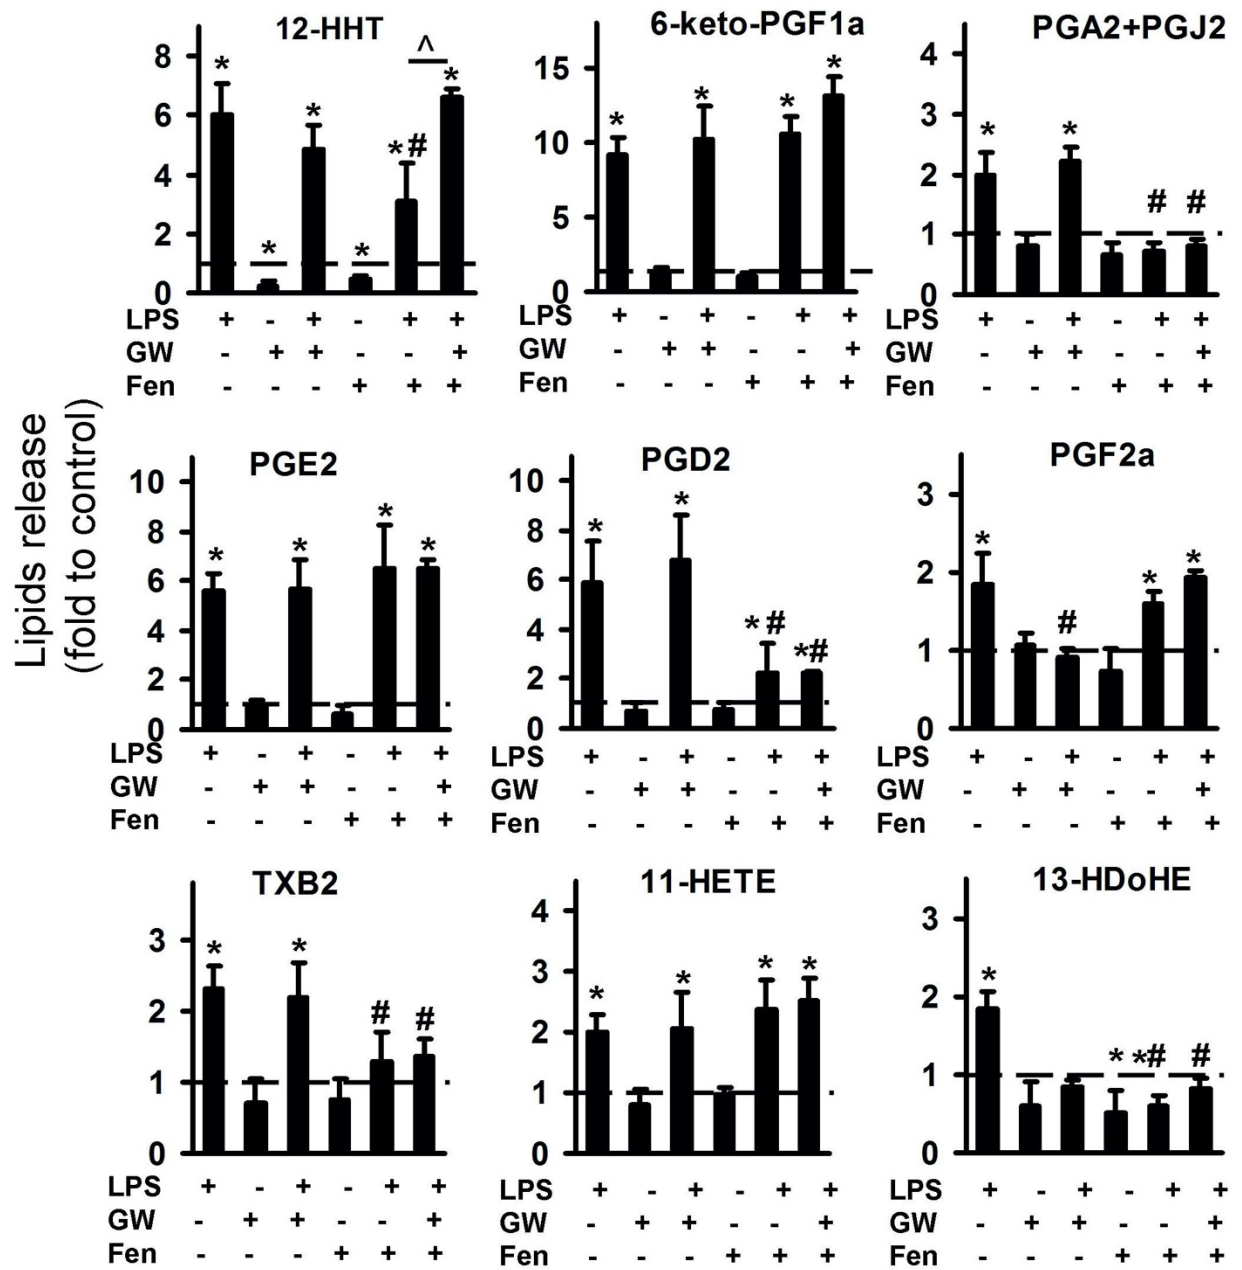

B

## LOX-pathway

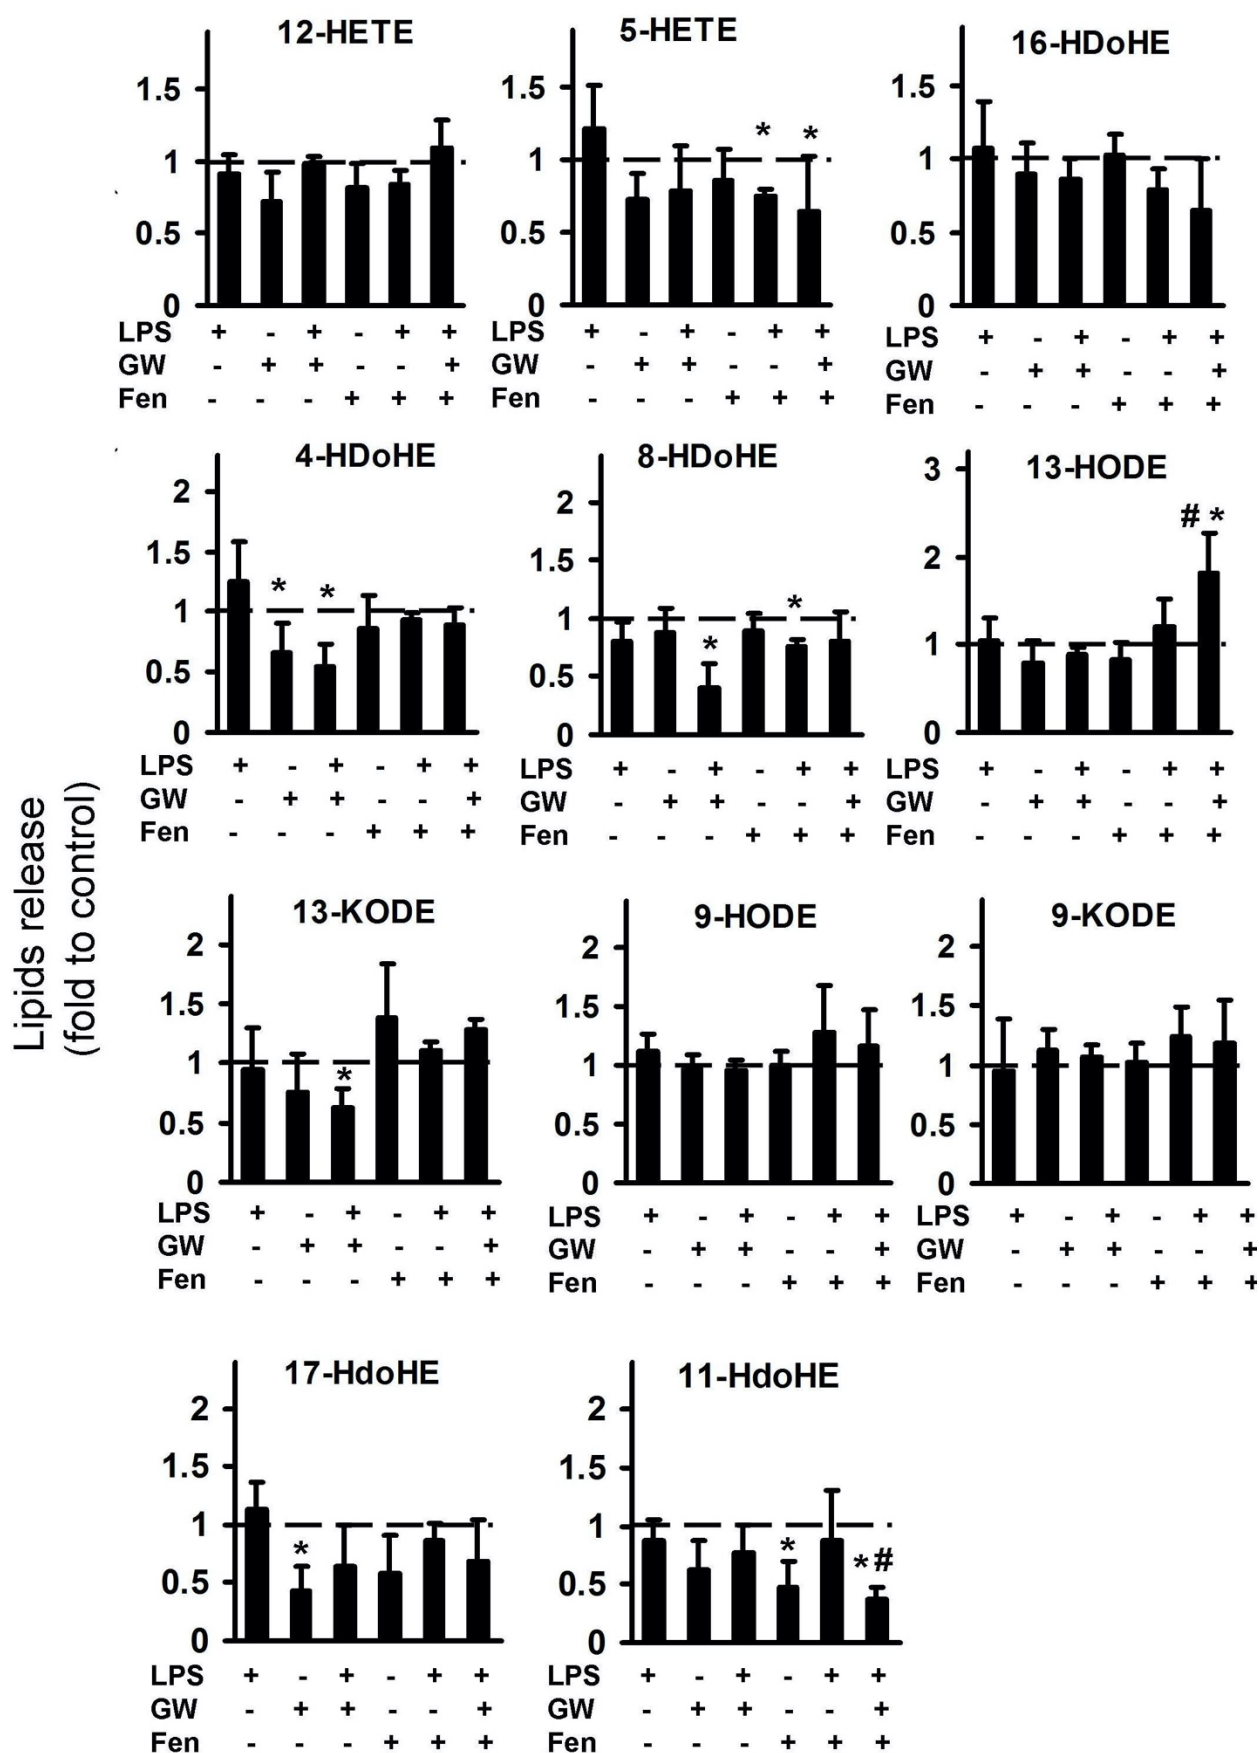

C

## CYP-pathway

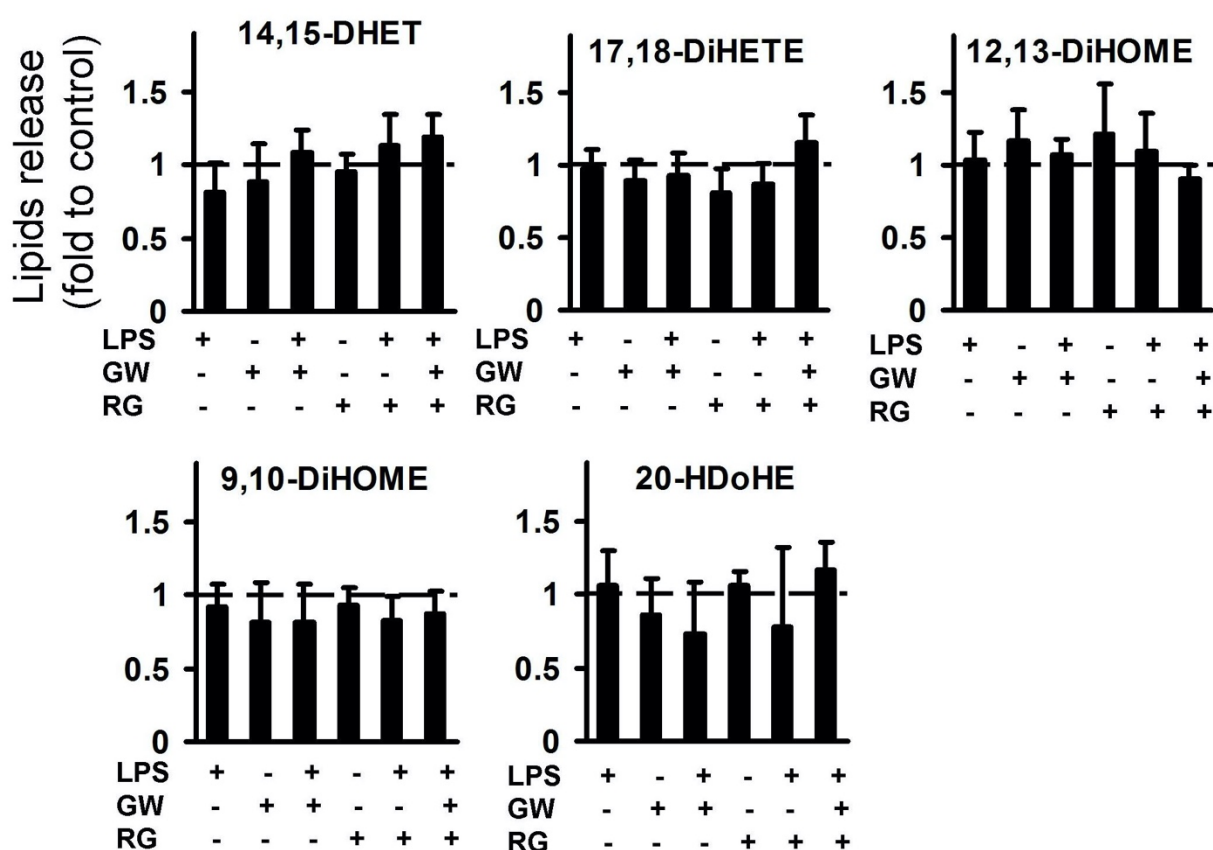

D

## PUFAs

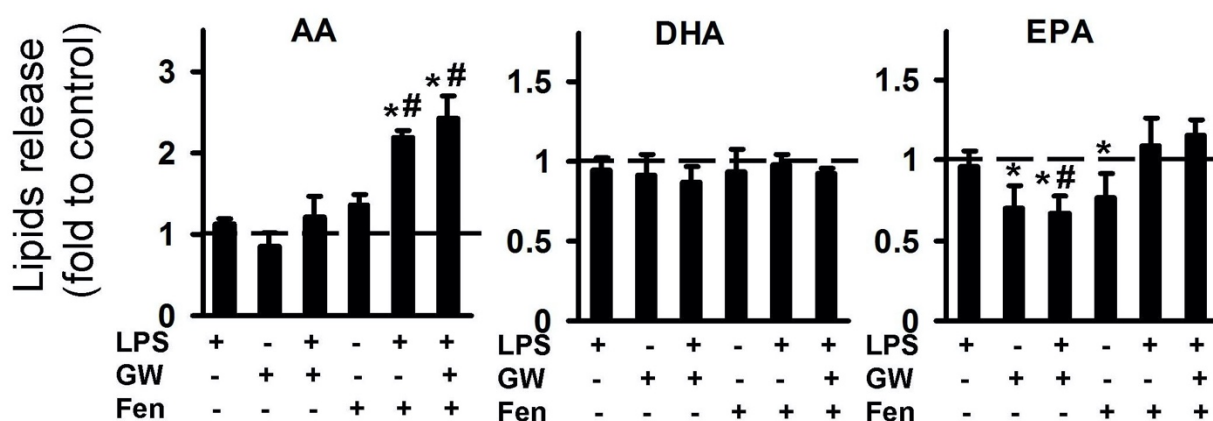

**Figure S1. Effect of PPAR $\alpha$  agonist Fenofibrate and antagonist GW6471 on the oxylipins release in the LPS-stimulated astrocytes.** Primary rat astrocytes were pretreated for 30 min with GW6471 (GW6, 5  $\mu$ M) or Fenofibrate (Fen, 50  $\mu$ M) or in combination, and then stimulated with LPS (100 ng/mL) for 4 h. Concentrations of oxylipins in supernatants were measured using UPLC-MS/MS. The bars show relative amounts of COX-derived lipid mediators. Values represent the mean  $\pm$  SEM from three independent experiments. \* $p$ <0.05, compared with the unstimulated cells, # $p$ < 0.05, compared with the LPS-stimulated cells, ^ $p$ <0.05, compared with the indicated bars.

A

## COX-pathway

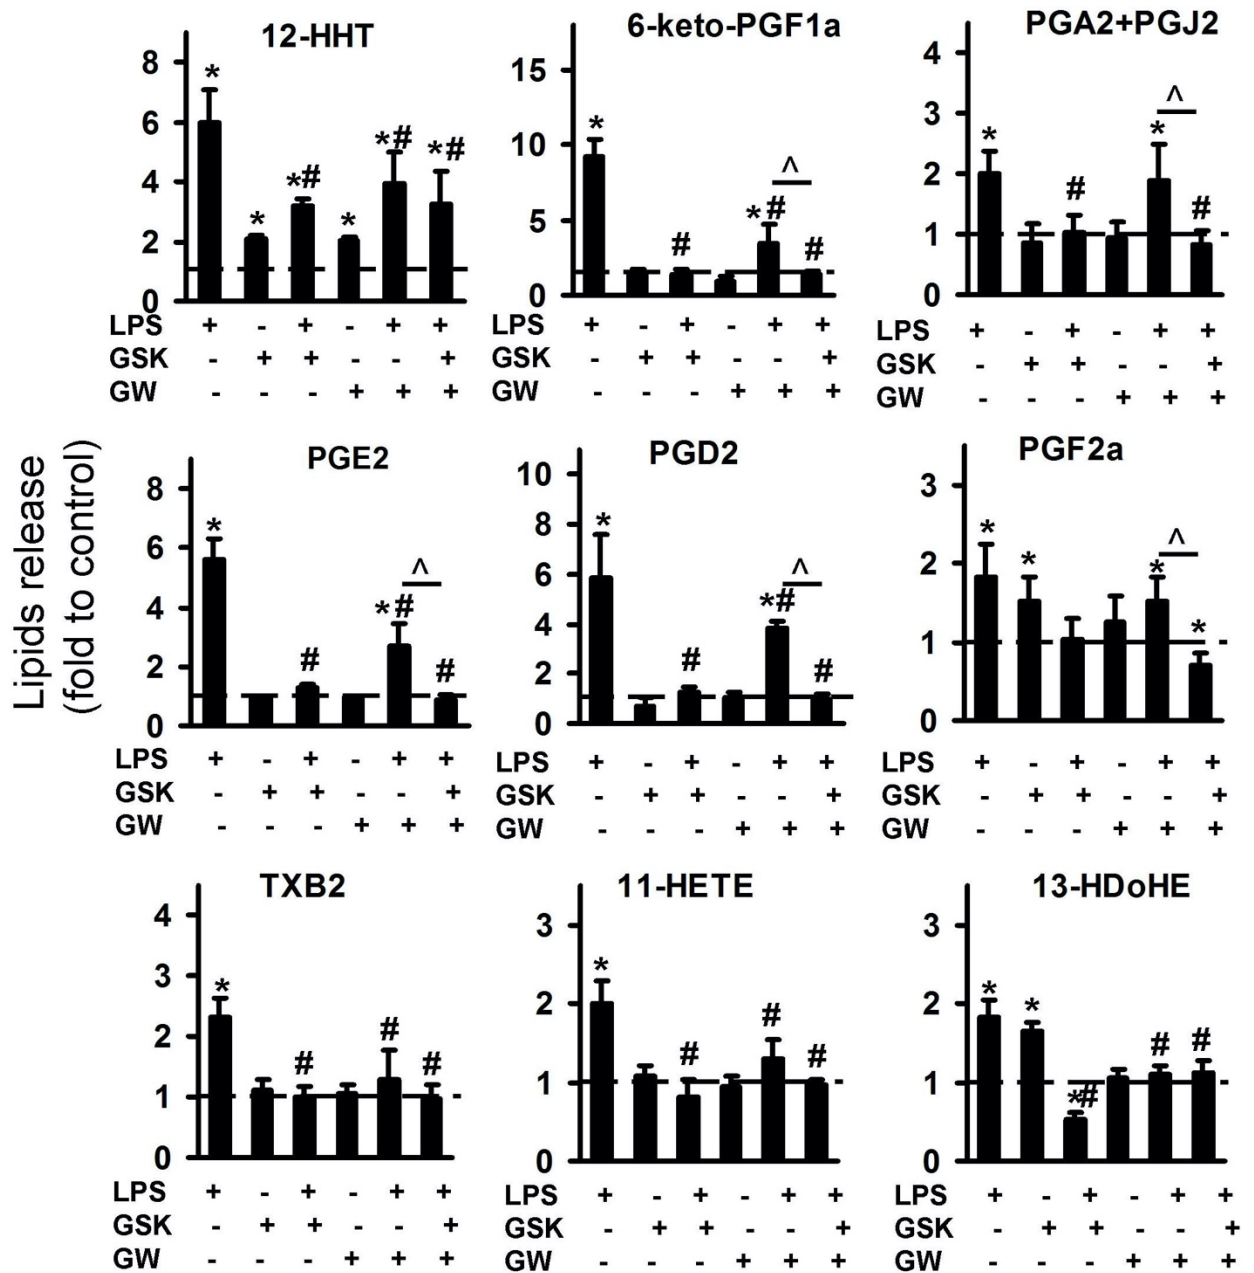

B

## LOX-pathway

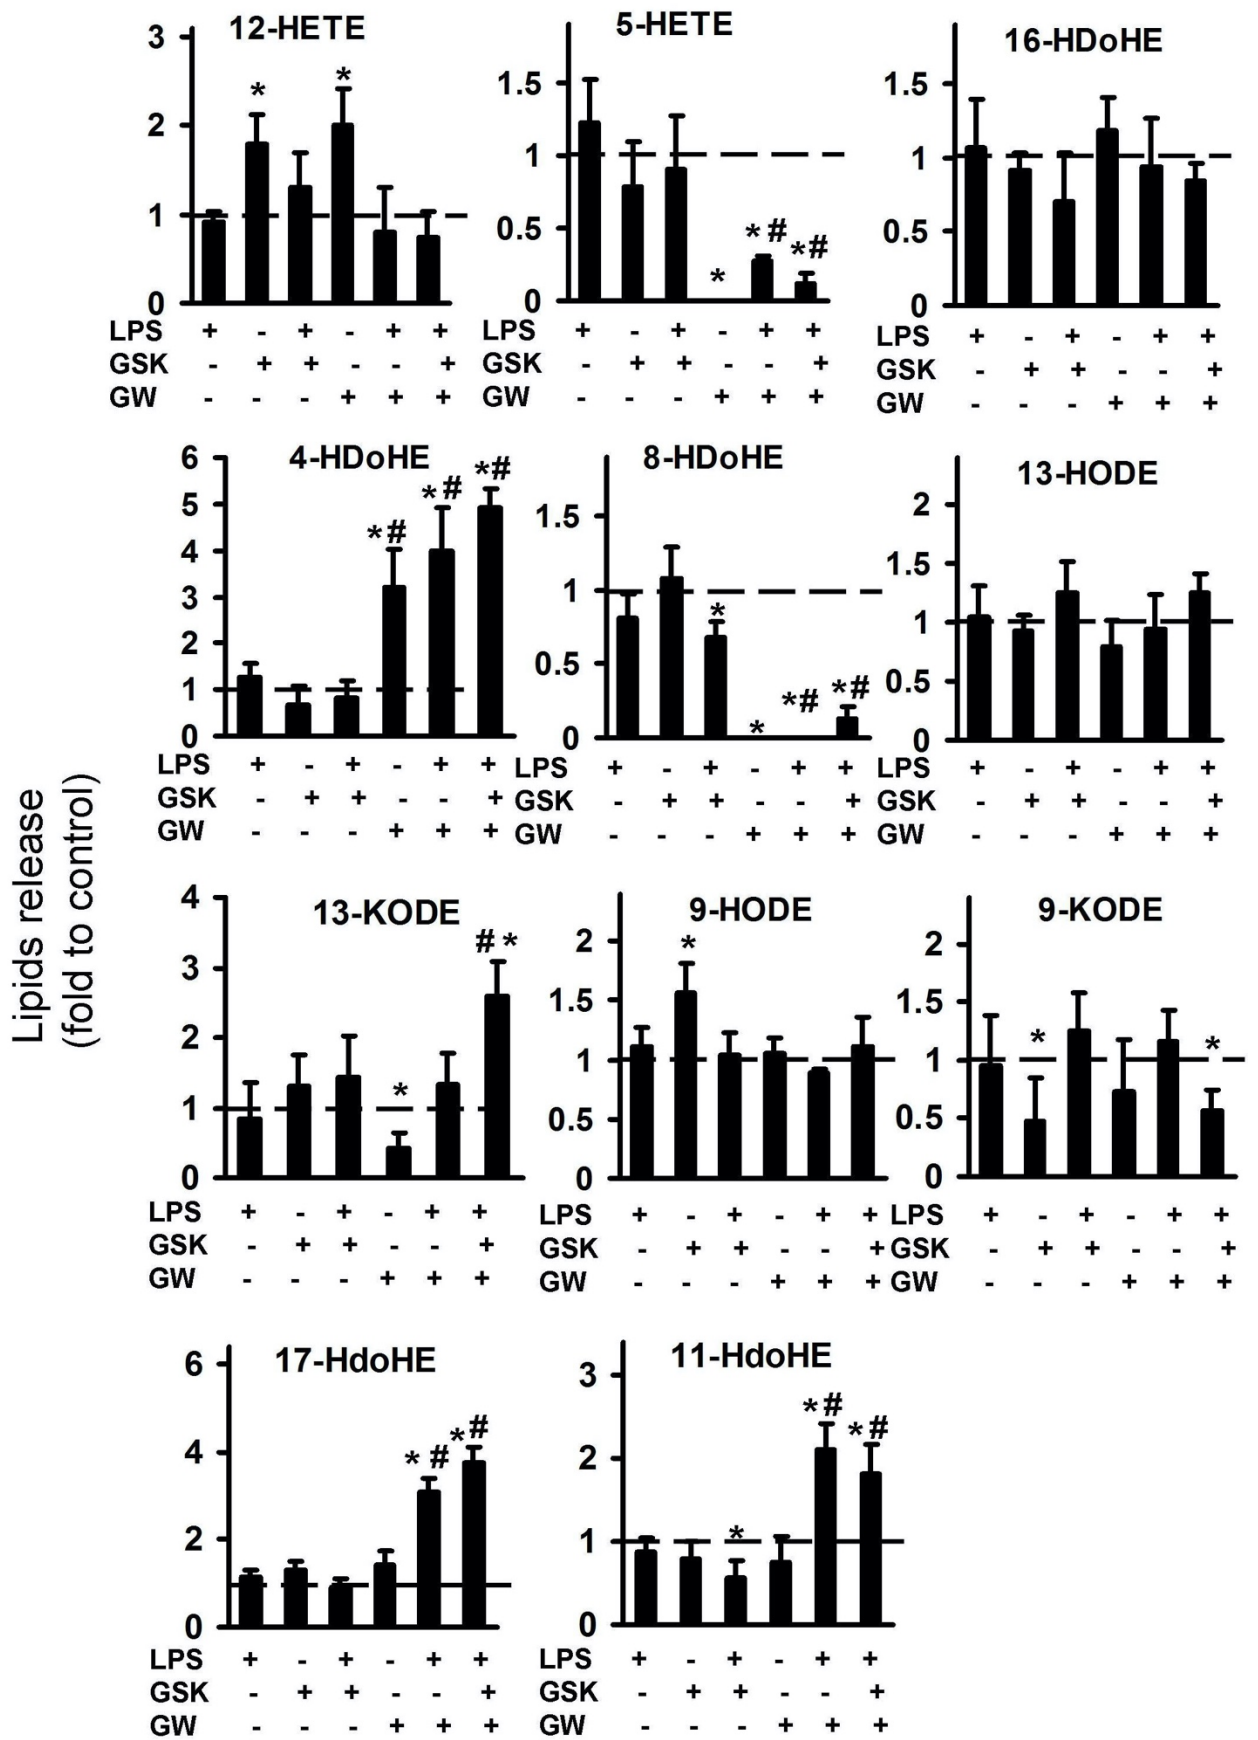

C

## CYP-pathway

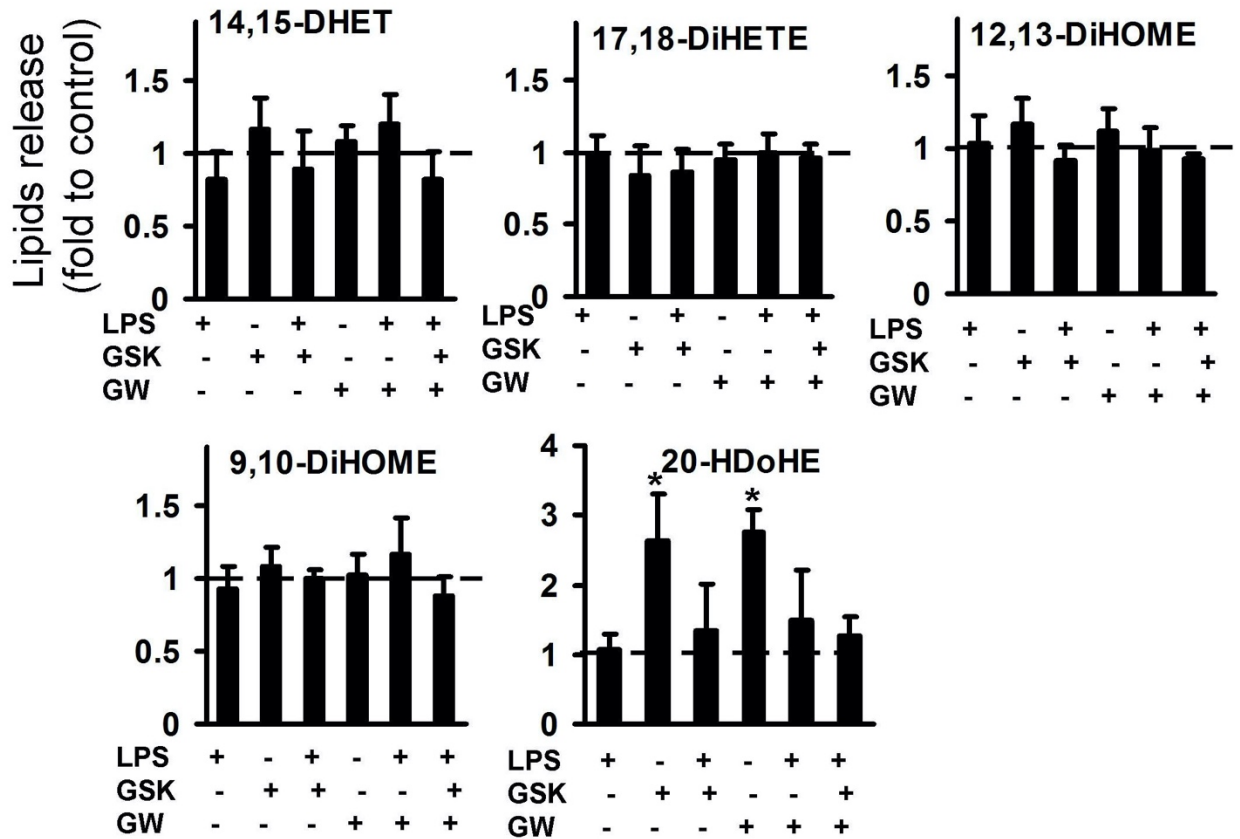

D

## PUFAs

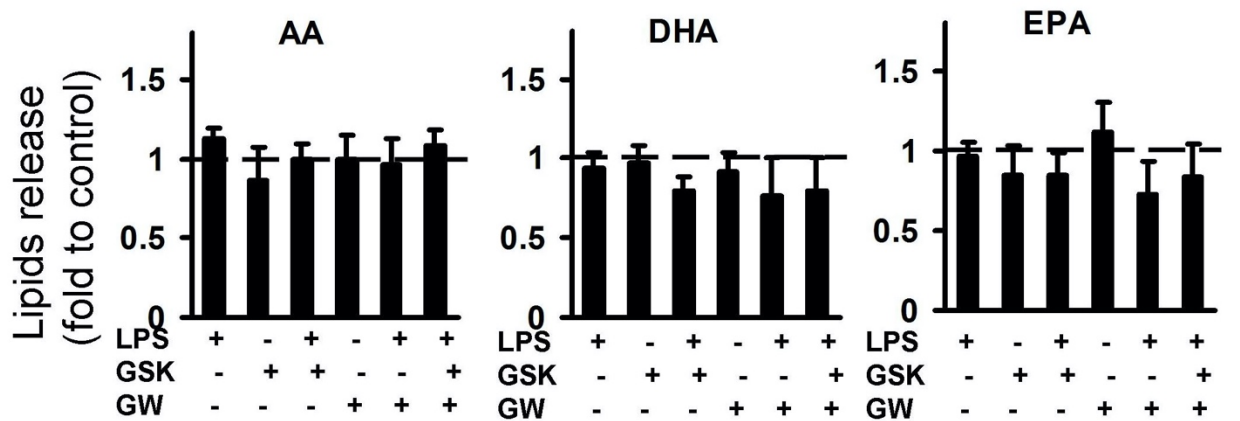

**Figure S2. Effect of PPARb agonist GW501516 and antagonist GSK0660 on the oxylipins release in the LPS-stimulated astrocytes.** Primary rat astrocytes were pretreated for 30 min with GSK0660 (GSK, 5  $\mu$ M) or GW501516 (GW5, 25  $\mu$ M) or in combination, and then stimulated with LPS (100 ng/mL) for 4 h. Concentrations of oxylipins in supernatants were measured using UPLC-MS/MS. The bars show relative amounts of COX-derived lipid mediators. Values represent the mean  $\pm$  SEM from three independent experiments. \* $p$ <0.05, compared with the unstimulated cells, # $p$ < 0.05, compared with the LPS-stimulated cells, ^ $p$ <0.05, compared with the indicated bars.



A

## COX-pathway

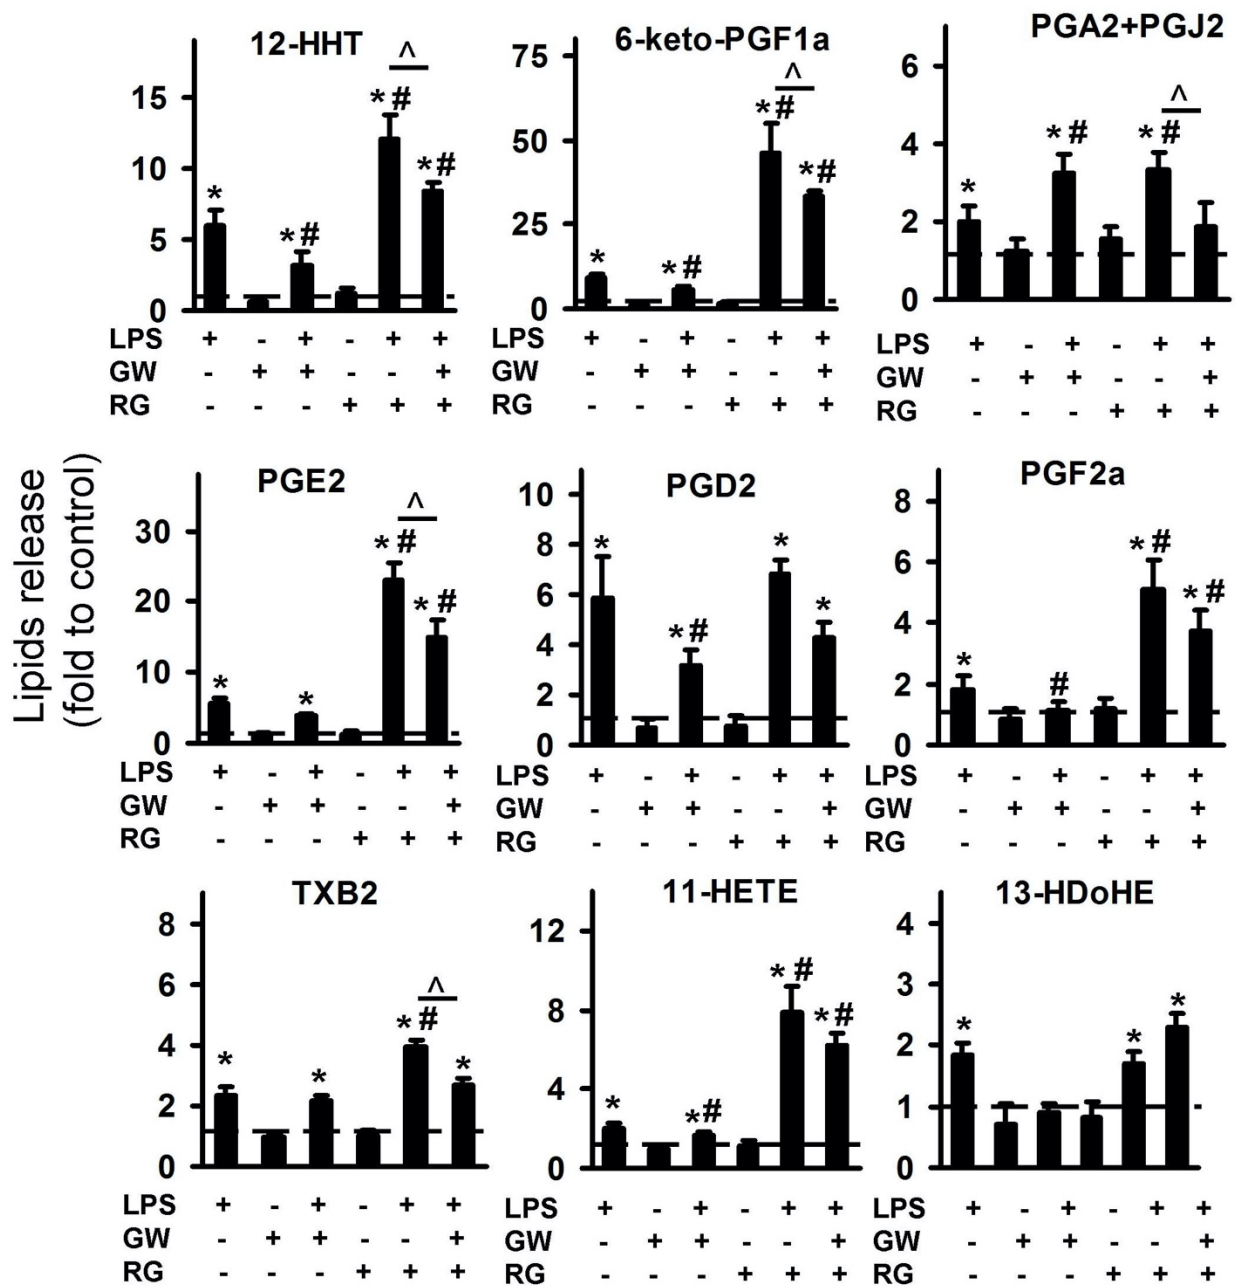



B

## LOX-pathway

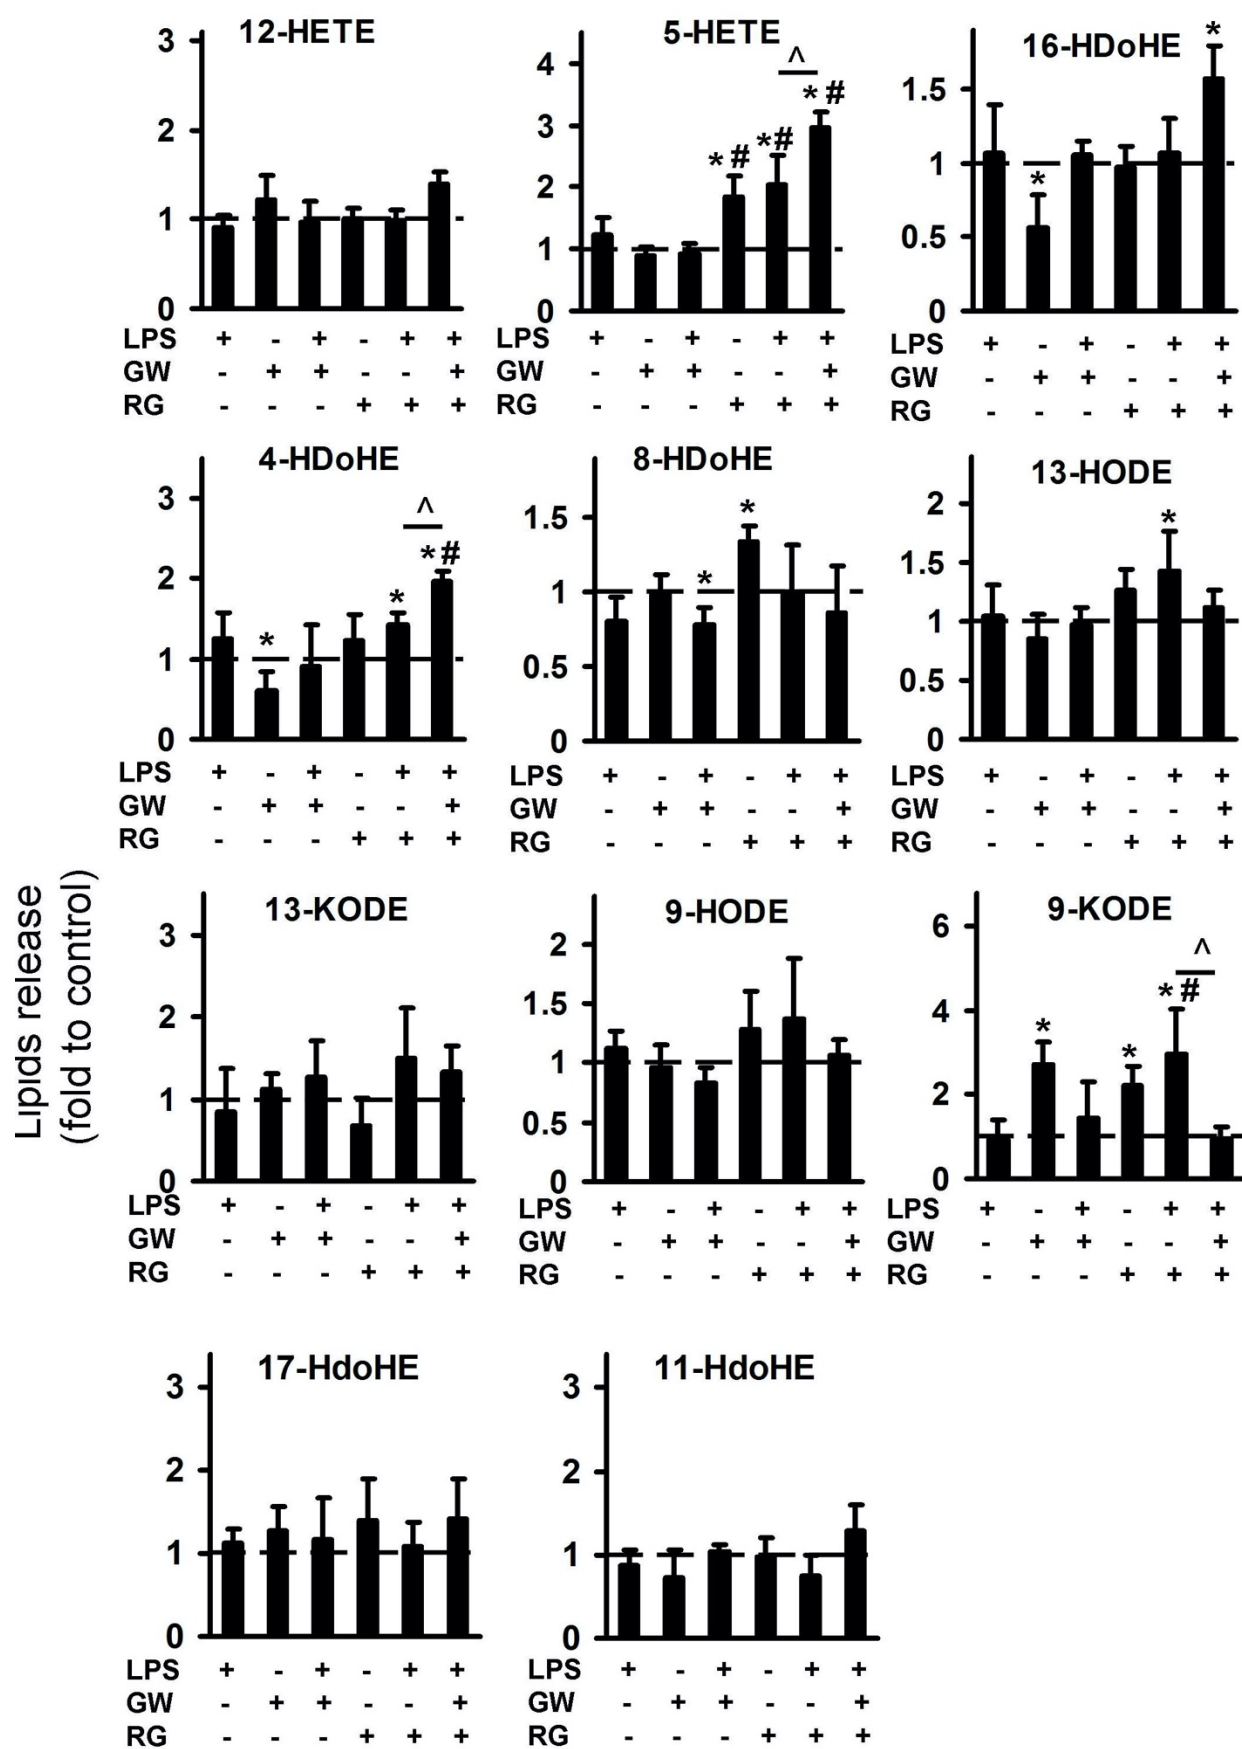

C

## CYP-pathway

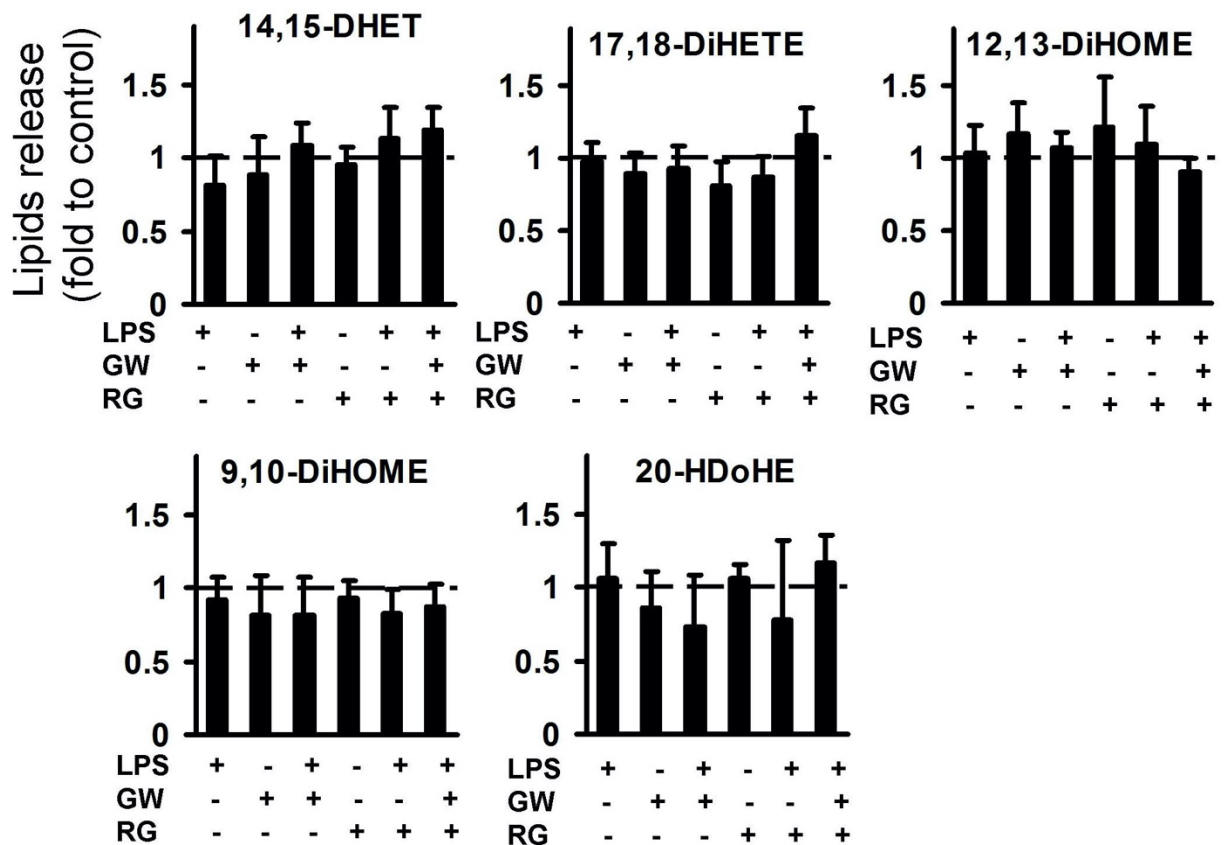

D

## PUFAs

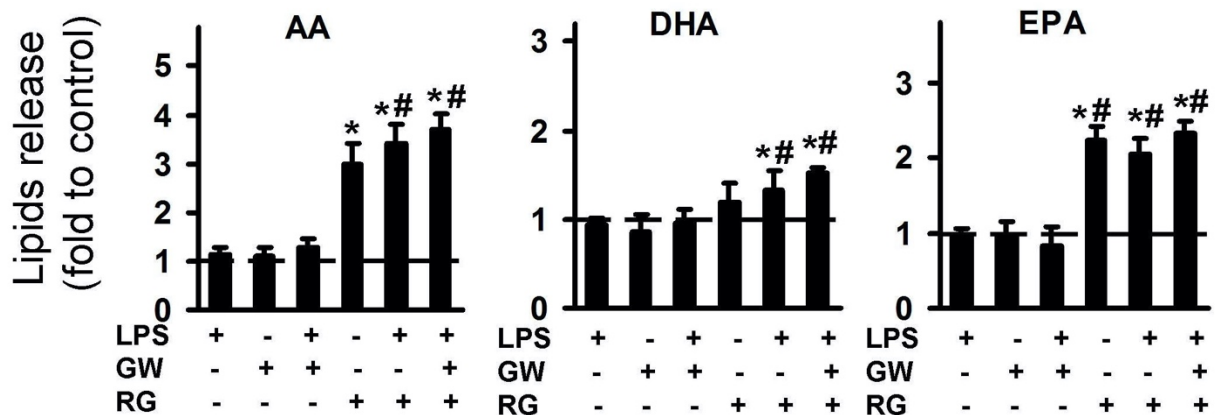

**Figure S3. Effect of PPAR $\gamma$  agonist rosiglitazone and antagonist GW9662 on the oxylipins release in the LPS-stimulated astrocytes.** Primary rat astrocytes were pretreated for 30 min with GW9662 (GW9, 5  $\mu$ M) or rosiglitazone (RG, 20  $\mu$ M) or in combination, and then stimulated with LPS (100 ng/mL) for 4 h. Concentrations of oxylipins in supernatants were measured using UPLC-MS/MS. The bars show relative amounts of COX-derived lipid mediators. Values represent the mean  $\pm$  SEM from three independent experiments. \* $p$ <0.05, compared with the unstimulated cells, # $p$ < 0.05, compared with the LPS-stimulated cells, ^ $p$ <0.05, compared with the indicated treatment.
